# Supplementary material
Source: MDPI journal article supplement (https://www.mdpi.com/1099-4300/23/10/1365)
Supplement: s1 [file s1]

Table S1 Herb compounds

| Herb                         | Active compounds                                                                                                                                               |
|------------------------------|----------------------------------------------------------------------------------------------------------------------------------------------------------------|
| KXS (kaixinsan)              | Panax Ginseng C.A.Mey, Poria Cocos(Schw.)Wolf.,<br>Acoritataninowii Rhizoma                                                                                    |
| DGSYS<br>(dangguishaoyaosan) | Poria Cocos(Schw.)Wolf., Angelicae Sinensis Radix, Paeoniae<br>Radix Alba, Chuanxiong Rhizoma, Atractylodes Macrocephala<br>Koidz., Alisma Orientale(Sam.)Juz. |
| YGS (yigansan)               | Poria Cocos(Schw.)Wolf., Angelicae Sinensis Radix, Chuanxiong<br>Rhizoma, Atractylodes Macrocephala Koidz., Radix Bupleuri,<br>Uncariae Ramulus Cumuncis       |
| YQTYT (yiqitongyutang)       | Panax Ginseng C.A.Mey., Angelicae Sinensis Radix, Chuanxiong<br>Rhizoma, Radix Salviae, Codonopsis Radix, Radix Paeoniae Rubra,<br>Hedysarum Multijugum Maxim. |

Table S2 Information of herb compound target genes

| Compound                    | Target genes                                                                                                                                                                                                                                                                                                                                                                                                                                                                                                                                                                                                                                                                                                                                                                                                                                                                                                                                                     |
|-----------------------------|------------------------------------------------------------------------------------------------------------------------------------------------------------------------------------------------------------------------------------------------------------------------------------------------------------------------------------------------------------------------------------------------------------------------------------------------------------------------------------------------------------------------------------------------------------------------------------------------------------------------------------------------------------------------------------------------------------------------------------------------------------------------------------------------------------------------------------------------------------------------------------------------------------------------------------------------------------------|
| Panax GinsengC.A.Mey.       | ACHE, ACP3, ADCYAP1, ADH1A, ADH1B, ADH1C, ADRA1A, ADRA1B, ADRA1D, ADRA2A, ADRA2B, ADRA2C, ADRB1, ADRB2, AHR, AHS1, AKR1C3, AKT1, ALOX5, AR, BAX, BCHE, BCL2, CACNA1S, CAMKK2, CASP1, CASP3, CASP8, CASP9, CDC2, CHRM1, CHRM2, CHRM3, CHRM4, CHRM5, CHRNA2, CHRNA7, CTRB1, CTSD, CYP1A1, CYP1A2, CYP1B1, CYP3A4, DIO1, DPP4, DRD5, F10, F2, F7, GABRA1, GABRA2, GABRA3, GABRA5, GABRA6, GLB1, GLRA1, GRIA2, GSK3B, GSTM1, GSTM2, GSTP1, HAS2, HMOX1, HSP90AA1, HTR2A, HTR3A, ICAM1, IFNG, IGHG1, IGHG2, IKBKB, IL1B, INSR, JUN, KCNH2, KCNMA1, KDR, LCT, LTA4H, MAN1A2, MAN2A1, MAOA, MAOB, MAP1B, MAP2, MAP2K4, MAPK14, MAPK8, MMP1, NCOA1, NCOA2, NFKBIA, NOS1, NOS2, NOS3, NR1I2, NR1I3, NR3C1, NR3C2, OPRD1, OPRM1, PDE3A, PGR, PIK3CG, PKIA, PLAU, PON1, PPARG, PPP3CA, PRKACA, PRKCA, PRSS1, PRSS3, PSMD3, PSMG1, PTGS1, PTGS2, PTPN1, PYGM, RELA, RHO, RXRA, RXRG, SCN5A, SELE, SLC2A4, SLC6A2, SLC6A3, SLC6A4, SLPI, STAT1, TGFB1, TNF, TOP-2, VCAM1, XDH |
| Acoritataninowii<br>Rhizoma | ACHE, ADH1A, ADH1B, ADH1C, ADRA1A, ADRA1B, ADRA1D, ADRA2A, ADRA2B, ADRA2C, ADRB1, ADRB2, AHR, AHS1, AKR1C3, AKT1, ALOX5, AR, BAX, BCL2, CA2, CAMKK2, CAMKK2, CASP3, CCL16, CCNA2, CDK2, CHEK1, CHRM1, CHRM2, CHRM3, CHRNA2, CHRNA7, COBT, CTRB1, CYP1A1, CYP1A2, CYP1B1, CYP3A4, DIO1, DPP4, DRD1, DRD5, ESR1, ESR2, F10, F2,                                                                                                                                                                                                                                                                                                                                                                                                                                                                                                                                                                                                                                    |



|                                  |                                                                                                                                                                                                                                                                                                                                                                                                                                                                                                                                                                                                                                                                                                                                                                                                                                                                                                                                                                                                                                                                                                                                                                                                                                                                                                                                                                                                                                                                                                                                                                                                                                                                                                                                                                                                                                                                                                                                                                                                                                                                                                                                                                                                                                                                                 |
|----------------------------------|---------------------------------------------------------------------------------------------------------------------------------------------------------------------------------------------------------------------------------------------------------------------------------------------------------------------------------------------------------------------------------------------------------------------------------------------------------------------------------------------------------------------------------------------------------------------------------------------------------------------------------------------------------------------------------------------------------------------------------------------------------------------------------------------------------------------------------------------------------------------------------------------------------------------------------------------------------------------------------------------------------------------------------------------------------------------------------------------------------------------------------------------------------------------------------------------------------------------------------------------------------------------------------------------------------------------------------------------------------------------------------------------------------------------------------------------------------------------------------------------------------------------------------------------------------------------------------------------------------------------------------------------------------------------------------------------------------------------------------------------------------------------------------------------------------------------------------------------------------------------------------------------------------------------------------------------------------------------------------------------------------------------------------------------------------------------------------------------------------------------------------------------------------------------------------------------------------------------------------------------------------------------------------|
|                                  | <p>PPARD, PPARG, PPIF , PRKACA, PRODH, PRSS3, PTGS1, PTGS2, PYY, RBP2, RXRA, SCD, SCN10A, SCN5A, SERPINE1, SLC2A2, SLC6A2, SLC6A3, SLC6A4, SLC7A7, SOAT1, SOD1, TEP1, TNF, TOP-2, TPI1, TRPV1, TYRP1, UCP2, UCP3, VEGFA</p> <p>ACHE, ADRA1A, ADRA1B, ADRB2, AHR, AHSA1, AKR1C3, AKT1, ALOX5, AR, BAX, BCL2, CAMKK2, CASP3, CASP8, CASP9, CAT, CD14, CDC2, CHRM1, CHRM2, CHRM3, CHRM4, CHRNA2, CHRNA7, CYP1A1, CYP1A2, CYP1B1, CYP3A4, DIO1, DPP4, DRD1, ESR1, F2, F7, GABRA1, GABRA2, GABRA3, GABRA5, GSTM1, GSTM2, GSTP1, HAS2, HMOX1, HSP90AB1, HTR2A, ICAM1, IKBKB, IL6, INSR, JUN, KCNH2, LBP, MAP2, MAPK8, MMP1, NCOA2, NOS2, NOS3, NR1I2, NR1I3, NR3C2, OPRM1, PDE3A, PGR, PIK3CG, PON1, PPARG, PPP3CA, PRKACA, PRKCA, PRSS1, PSMD3, PTGS1, PTGS2, RELA, RXRA, SCN5A, SELE, SLC2A4, SLC6A2, SLC6A4, SLPI, STAT1, TGFB1, TNF, TOP-2, VCAM1, XDH</p> <p>ABAT, ACHE, ADH1A, ADH1B, ADH1C, ADRA1A, ADRA1B, ADRA2A, ADRA2B, ADRA2C, ADRB1, ADRB2, ADSS1, AGXT, AGXT2, AKR1, ALAS1, ALAS2, ALDH1A1, ALDH2, ALDH5A1, ALOX5, AMY2A, AR, ARG, ARG1, ARS, ATP2C1, BCAT1, BCHE, CA2, CAMKK2, CAT, CDC2, CDC25B, CHRM1, CHRM2, CHRM3, CHRM4, CHRNA2, CHRNA7, CKM, CPT2, CTH, CTRB1, CTSD, DAO, DHODH, DPP4, DRD1, DRD5, F10, F13A1, F2, F7, GABRA1, GABRA2, GABRA3, GABRA5, GABRA6, GALE, GARS1, GATM, GCAT, GFOD1, GLB1, GLDC, GLRA1, GLRA2, GLRA3, GLUD1, GLUD2, GLYAT, GLYATL1, GNMT, GOT1, GOT2, GPHN, GPI, GPT, GPT2, GRIA1, GRIA2, GRIK2, GRIN1, GRIN2A, GRIN2B, GRIN2C, GRIN3A, HSP90AA1, IGHG1, IGHG2, IL1B, IL6, KCNH2, KCNMA1, KYNU, LDHA, LDHB, LPCAT2, LTA4H, LTF, MAN1A2, MAOB, MARS1, MAT1A, MAT2A, ME1, ME2, ME3, MMP12, MMP8, MOCS1, MTR, NAGS, NCOA1, NCOA2, NFS1, NOS1, NOS3, NR3C1, NR3C2, OAT, OPLAH, OPRM1, OTC, P3H3, P4HA1, PC, PDE3A, PDHB, PFAS, PGF, PGR, PIK3CG, PIM1, PIPOX, PLA2G1B, PLA2G2E, PPARG, PPIA, PPIF , PRODH, PRSS3, PTER, PTGS1, PTGS2, PYGL, PYGM, REN, RRM1, RXRA, SAP18, SCN5A, SDHA, SHMT1, SHMT2, SLC25A10, SLC25A12, SLC25A13, SLC36A1, SLC6A2, SLC6A3, SLC6A4, SLC6A9, SRC, TKFC , TNF, TOP-2, TPI1, TXNRD1, UL30, VEGFA, XDH, YARS2</p> <p>ACHE, ADH1B, ADH1C, ADRA1B, CHRM1, CHRM2, CHRM3, CHRNA7, DPP4, F2, GABRA1, GABRA2, GABRA3, GABRA5, GABRA6, GRIA2, IGHG1, IGHG2, MAN2A1, NCOA2, NR3C1, NR3C2, PGR, PRSS3, PTGS1, PTGS2</p> |
| Paeoniae Radix Alba              |                                                                                                                                                                                                                                                                                                                                                                                                                                                                                                                                                                                                                                                                                                                                                                                                                                                                                                                                                                                                                                                                                                                                                                                                                                                                                                                                                                                                                                                                                                                                                                                                                                                                                                                                                                                                                                                                                                                                                                                                                                                                                                                                                                                                                                                                                 |
| Atractylodes Macrocephala Koidz. |                                                                                                                                                                                                                                                                                                                                                                                                                                                                                                                                                                                                                                                                                                                                                                                                                                                                                                                                                                                                                                                                                                                                                                                                                                                                                                                                                                                                                                                                                                                                                                                                                                                                                                                                                                                                                                                                                                                                                                                                                                                                                                                                                                                                                                                                                 |
| Alisma Orientale (Sam.) Juz.     |                                                                                                                                                                                                                                                                                                                                                                                                                                                                                                                                                                                                                                                                                                                                                                                                                                                                                                                                                                                                                                                                                                                                                                                                                                                                                                                                                                                                                                                                                                                                                                                                                                                                                                                                                                                                                                                                                                                                                                                                                                                                                                                                                                                                                                                                                 |

Radix Bupleuri

ABCA2, ACACA, ACHE, ACP3, ADH1C, ADRA1A, ADRA1B, ADRA2A, ADRB1, ADRB2, AHR, AHS1, AKR1C3, AKT1, ALOX5, AR, ARG, BAX, BCL2, BCL2L1, BIRC5, CASP3, CASP8, CASP9, CAV1, CCL2, CCNA2, CCNB1, CCND1, CD40LG, CDKN1A, CHEK1, CHEK2, CHRM1, CHRM2, CHRM3, CHRNA7, CHUK, CLDN4, COL1A1, COL1A3, CRP, CTNNBIP1, CTRB1, CTSD, CXCL10, CXCL11, CXCL2, CXCL8, CYP1A1, CYP1A2, CYP1B1, CYP3A4, DCAF5, DHODH, DIO1, DRD5, DUOX2, E2F1, E2F2, EGF, EGFR, EIF6, ELK1, ERBB2, ERBB3, ESR1, ESR2, F2, F3, F7, FOS, GABRA1, GABRA2, GABRA3, GABRA5, GARS1, GJA1, GRIA2, GRP78, GSK3B, GSTM1, GSTM2, GSTP1, HAS2, HIF1A, HK2, HMOX1, HSF1, HSPB1, HTR2A, ICAM1, IFNG, IGF2, IGFBP3, IGHG1, IGHG2, IKBKB, IL10, IL1A, IL1B, IL2, IL6, INSR, IRF1, JUN, KCNH2, LTA4H, MAOB, MAPK1, MAPK14, MAPK8, MARS1, MGAM, MMP1, MMP2, MMP3, MMP9, MPO, MYC, NCF1, NCOA1, NCOA2, NFE2L2, NFKBIA, NKX3-1, NOS2, NOS3, NPEPPS, NQO1, NR1I2, NR1I3, NR3C2, ODC1, OLR1, PCOLCE, PGR, PIK3CG, PIM1, PKM, PLAT, PLA2, PON1, POR, PPARA, PPARG, PPARG, PPIF, PPP3CA, PRKCA, PRKCB, PRSS1, PSMD3, PTEN, PTER, PTGER3, PTGS1, PTGS2, PTPN1, PYGM, RAF1, RASA1, RASSF1, RB1, RELA, RUNX1T1, RUNX2, RXRA, SCN5A, SELE, SERPINE1, SLC2A4, SLC6A2, SLC6A3, SLPI, SOD1, SPP1, STAT1, STE, TGFB1, THBD, TNF, TNKS, TOP1, TOP2, TOP2A, TP53, VCAM1, VEGFA, XDH

Uncariae Ramulus  
Cumuncis

AARS1, ABCA2, ACACA, ACHE, ACP3, ADH1A, ADH1C, ADRA1A, ADRA1B, ADRA1D, ADRA2A, ADRA2B, ADRA2C, ADRB1, ADRB2, AHR, AHS1, AKR1, AKR1C3, AKT1, ALOX5, AR, ARG, BACE1, BAX, BCL2, BCL2L1, BIRC5, CA2, CASP3, CASP8, CASP9, CAV1, CCL2, CCNB1, CCND1, CD40LG, CDKN1A, CHEK1, CHEK2, CHRM1, CHRM2, CHRM3, CHRM4, CHRM5, CHRNA2, CHRNA7, CHUK, CLDN4, COL1A1, COL1A3, CRP, CTNNBIP1, CTSD, CXCL10, CXCL11, CXCL2, CXCL8, CYP1A1, CYP1A2, CYP1B1, CYP3A4, DAO, DCAF5, DHODH, DIO1, DRD2, DRD3, DRD5, DUOX2, E2F1, E2F2, EGF, EGFR, EIF6, ELK1, ERBB2, ERBB3, ESR1, ESR2, F10, F2, F3, F7, FOS, GABRA1, GABRA2, GABRA3, GABRA5, GABRA6, GARS1, GJA1, GRIA2, GRP78, GSK3B, GSTM1, GSTM2, GSTP1, HAS2, HIF1A, HK2, HMOX1, HSF1, HSPB1, HTR2A, HTR2C, HTR3A, HTR7, ICAM1, IFNG, IGF2, IGFBP3, IGHG1, IGHG2, IKBKB, IL10, IL1A, IL1B, IL2, IL6, INSR, IRF1, ISYNA1, JUN, KCNH2, KDR, LPCAT2, LPL, MAOB, MAP2, MAPK1, MAPK8, MARS1, MDK, MET, MGAM, MMP1, MMP2, MMP3, MMP9, MPO, MYC, NCF1, NCOA1, NCOA2, NFE2L2, NFKBIA, NGF, NKX3-1, NOS2, NOS3, NPEPPS, NQO1, NR1I2, NR1I3, NR3C1, NR3C2, ODC1, OPRD1, OPRK1,

|                      |                                                                                                                                                                                                                                                                                                                                                                                                                                                                                                                                                                                                                                                                                                                                                                                                                                                                                                                                    |
|----------------------|------------------------------------------------------------------------------------------------------------------------------------------------------------------------------------------------------------------------------------------------------------------------------------------------------------------------------------------------------------------------------------------------------------------------------------------------------------------------------------------------------------------------------------------------------------------------------------------------------------------------------------------------------------------------------------------------------------------------------------------------------------------------------------------------------------------------------------------------------------------------------------------------------------------------------------|
|                      | <p>OPRM1, PCOLCE, PDE10A, PDE3A, PGR, PIK3CG, PIM1, PKM, PLA2G2E, PLAT, PLAU, PON1, POR, PPARA, PPARG, PPIF, PPP3CA, PRKCA, PRKCB, PRSS1, PRSS3, PSMD3, PTEN, PTER, PTGER3, PTGS1, PTGS2, PTPN1, RAF1, RASA1, RASSF1, RB1, RELA, RUNX1T1, RUNX2, RXRA, RXRB, SCN5A, SELE, SERPINE1, SLC2A4, SLC6A2, SLC6A3, SLC6A4, SLPI, SOD1, SPP1, STAT1, STE, TGFB1, THBD, TNF, TNKS, TOP1, TOP-2, TOP2A, TP53, VCAM1, VEGFA, XDH</p>                                                                                                                                                                                                                                                                                                                                                                                                                                                                                                          |
| Radix Salviae        | <p>AARS1, ACHE, ADCY2, ADRA1A, ADRA1B, ADRA1D, ADRA2A, ADRA2B, ADRA2C, ADRB2, AHS1, AKT1, APP, AR, ARG, BCL2, BCL2L1, BIRC5, CALCR, CASP3, CASP7, CASP9, CCNA2, CCNB1, CCND1, CD40LG, CDKN1A, CHEK1, CHRM1, CHRM2, CHRM3, CHRM4, CHRM5, CHRNA2, CHRNA7, CYP1A1, CYP1A2, CYP3A4, DHODH, DRD2, DRD5, ECE1, EDN1, EDNRA, EGFR, ERBB2, ESR1, ESR2, F10, F2, F7, FASN, FOS, GABRA1, GABRA2, GABRA3, GABRA5, GABRA6, GABRE, GABRG3, GARS1, GSK3B, GSTP1, HMOX1, HTR1A, HTR1B, HTR2A, HTR2C, HTR3A, ICAM1, IFNG, IGHG1, IGHG2, IL10, IL2, IL4, IL6, INSR, ITGB3, JUN, KCNH2, LPCAT2, MAPK1, MAPK14, MCL1, MDM2, MET, MMP1, MMP2, MMP9, MYC, NCOA1, NCOA2, NFKBIA, NOS2, NPM1, NR1H2, NR3C1, NR3C2, NUF2, OPRD1, OPRM1, PCNA, PDE3A, PGR, PIK3CG, PIM1, PKM, PPARG, PPIF, PRSS1, PTER, PTGES, PTGS1, PTGS2, PTPN1, RB1, RELA, RXRA, SCN5A, SLC2A4, SLC6A2, SLC6A3, SLC6A4, STAT3, TNF, TNKS, TOP1, TOP-2, TOP2A, TP53, TYR, VEGFA, XDH</p> |
| Codonopsis Radix     | <p>AARS1, ACHE, ADCY2, ADH1C, ADRA1A, ADRA1B, ADRA1D, ADRA2A, ADRB1, ADRB2, AKT1, AR, ARG, BCL2L1, BIRC5, CASP3, CASP7, CASP9, CCNA2, CCNB1, CCND1, CD40LG, CDKN1A, CHEK1, CHRM1, CHRM2, CHRM3, CHRM5, CHRNA7, CTRB1, DHODH, DRD5, EGFR, ERBB2, ESR1, ESR2, F10, GABRA1, GABRA2, GABRA5, GSK3B, GSTP1, HMOX1, HTR2A, ICAM1, IFNG, IGHG1, IGHG2, IL10, IL2, IL4, IL6, INSR, JUN, LTA4H, MAOB, MAPK1, MAPK14, MARS1, MCL1, MDM2, MET, MMP1, MMP13, MMP2, MMP8, MMP9, NCOA1, NCOA2, NFKBIA, NOS2, NR3C1, NR3C2, NUF2, OPRD1, OPRM1, PCNA, PDE3A, PGR, PIK3CG, PIM1, PKIA, PKM, PLAU, PPARG, PPIF, PRSS1, PTGES, PTGS1, PTGS2, PTPN1, RB1, RELA, RXRA, SCN5A, SLC2A4, SLC6A2, SLC6A3, SLC6A4, TNF, TOP1, TOP2A, TP53, TUBB1, TYR, VEGFA, XDH</p>                                                                                                                                                                                       |
| Radix Paeoniae Rubra | <p>ADH1C, ADRA1A, ADRA1B, ADRA2A, ADRB1, ADRB2, AHR, AKT1, ALOX12, APOD, AR, ARG, BAX, BCL2, CASP3, CASP8, CASP9, CAT, CCNB1, CD14, CDKN1A, CHRM1, CHRM2, CHRM3, CHRM4, CHRNA2, CHRNA7, CTNNBIP1, CTRB1, CXCL8, CYCS,</p>                                                                                                                                                                                                                                                                                                                                                                                                                                                                                                                                                                                                                                                                                                          |

|                                |                                                                                                                                                                                                                                                                                                                                                                                                                                                                                                                                                                                                                                                                                                                                                                                                                                                                                                                                                                                                                                                                                                                                                                                                                                                                                                                                                                                                                                                                                                                                                                                                                                                                                                                                                                                                                                                                                                                                                                                                                                                                                                                                                                                                           |
|--------------------------------|-----------------------------------------------------------------------------------------------------------------------------------------------------------------------------------------------------------------------------------------------------------------------------------------------------------------------------------------------------------------------------------------------------------------------------------------------------------------------------------------------------------------------------------------------------------------------------------------------------------------------------------------------------------------------------------------------------------------------------------------------------------------------------------------------------------------------------------------------------------------------------------------------------------------------------------------------------------------------------------------------------------------------------------------------------------------------------------------------------------------------------------------------------------------------------------------------------------------------------------------------------------------------------------------------------------------------------------------------------------------------------------------------------------------------------------------------------------------------------------------------------------------------------------------------------------------------------------------------------------------------------------------------------------------------------------------------------------------------------------------------------------------------------------------------------------------------------------------------------------------------------------------------------------------------------------------------------------------------------------------------------------------------------------------------------------------------------------------------------------------------------------------------------------------------------------------------------------|
| Hedysarum Multijugum<br>Maxim. | <p>DHODH, DRD5, EGLN1, ESR1, F10, F2, FABP, FOS, FOSL1, FOSL2, GABRA1, GABRA3, GABRA5, GABRA6, GSTA1, GSTA2, GSTM1, GSTM2, GSTP1, HAS2, HIF1A, HTR2A, IGF2, IGHG1, IGHG2, IL6, JUN, KCNH2, LBP, LTA4H, MAOB, MAP2, MARS1, MMP2, MMP9, MPO, NCOA1, NCOA2, NFATC1, NFKBIA, NOS2, NOX5, NR3C2, OPRM1, PDE3A, PGR, PLAU, PON1, PPIF, PRKCA, PRKCB, PRSS1, PTER, PTGS1, PTGS2, PTPN1, RELA, RXRA, SCN5A, SLC6A2, SLC6A3, SLC6A4, TDRD7, TGFB1, TNF, TP53, VEGFA</p> <p>AARS1, ABAT, ABCA2, ACACA, ACHE, ACP3, ACTB, ADH1A, ADH1C, ADRA1A, ADRA1B, ADRA1D, ADRA2A, ADRA2B, ADRA2C, ADRB1, ADRB2, AHR, AHSA1, AKR1, AKR1C3, AKT1, ALB, ALOX5, APOB, AR, ARG, ATP5F1B, BAX, BCHE, BCL2, BCL2L1, BIRC5, CA2, CASP3, CASP8, CASP9, CAV1, CCL2, CCNA2, CCNB1, CCND1, CD40LG, CDC25B, CDKN1A, CHEK1, CHEK2, CHRM1, CHRM2, CHRM3, CHRM4, CHRM5, CHRNA7, CHUK, CLDN4, COL1A1, COL1A3, CRP, CTNNBIP1, CTRB1, CTSD, CXCL10, CXCL11, CXCL2, CXCL8, CYP1A1, CYP1A2, CYP1B1, CYP3A4, DAO, DCAF5, DHODH, DIO1, DRD5, DUOX2, E2F1, E2F2, EGF, EGFR, EIF6, ELK1, ERBB2, ERBB3, ESR1, ESR2, F10, F2, F3, F7, FOS, GABRA1, GABRA2, GABRA3, GABRA5, GABRA6, GARS1, GATM, GJA1, GOT1, GOT2, GRIA1, GRIA2, GRIK2, GRIN1, GRIN2B, GRP78, GSK3B, GSTM1, GSTM2, GSTP1, HAS2, HIF1A, HK2, HMOX1, HNF1A, HNF4A, HP, HSD3B1, HSD3B2, HSF1, HSPB1, HTR2A, HTR3A, ICAM1, IFNG, IGF2, IGFBP3, IGHG1, IGHG2, IKBKB, IL10, IL1A, IL1B, IL2, IL4, IL6, INSR, IRF1, JUN, KCNH2, KDR, LPCAT2, LPL, LTA4H, MAN2A1, MAOB, MAPK1, MAPK14, MAPK8, MARS1, ME2, MET, MGAM, MMP1, MMP2, MMP3, MMP9, MOGAT2, MPO, MT-ND6, MYC, NCF1, NCOA1, NCOA2, NFE2L2, NFKBIA, NKX3-1, NOS2, NOS3, NPEPPS, NQO1, NR1I2, NR1I3, ODC1, OLR1, OPRD1, OPRM1, P4HA1, PCNA, PCOLCE, PDE3A, PDHX, PGR, PIK3CG, PIM1, PKIA, PKM, PLAT, PLAU, PON1, POR, PPARA, PPARD, PPARG, PPARGC1A, PPIA, PPIF, PPP3CA, PRKCA, PRKCB, PRSS1, PRSS3, PSMD3, PTEN, PTER, PTGER3, PTGS1, PTGS2, PTPN1, PYGM, RAF1, RASA1, RASSF1, RB1, RELA, REN, RUNX1T1, RUNX2, RXRA, RXRB, RXRG, SCN5A, SELE, SERPINE1, SIRT1, SLC2A4, SLC6A2, SLC6A3, SLC6A4, SLPI, SOD1, SPP1, STAT1, STE, TGFB1, THBD, TKFC, TNF, TNKS, TOP1, TOP2, TOP2A, TP53, TPI1, TRIM26, TRPV1, TYRP1, UCP2, VCAM1, VEGFA, XDH</p> |
|--------------------------------|-----------------------------------------------------------------------------------------------------------------------------------------------------------------------------------------------------------------------------------------------------------------------------------------------------------------------------------------------------------------------------------------------------------------------------------------------------------------------------------------------------------------------------------------------------------------------------------------------------------------------------------------------------------------------------------------------------------------------------------------------------------------------------------------------------------------------------------------------------------------------------------------------------------------------------------------------------------------------------------------------------------------------------------------------------------------------------------------------------------------------------------------------------------------------------------------------------------------------------------------------------------------------------------------------------------------------------------------------------------------------------------------------------------------------------------------------------------------------------------------------------------------------------------------------------------------------------------------------------------------------------------------------------------------------------------------------------------------------------------------------------------------------------------------------------------------------------------------------------------------------------------------------------------------------------------------------------------------------------------------------------------------------------------------------------------------------------------------------------------------------------------------------------------------------------------------------------------|

Table S3-1 KEGG Enrichment analysis of similar genes between target genes of KXS compound and essential genes of AD

| Term                                               | P Value               |
|----------------------------------------------------|-----------------------|
| hsa05164:Influenza A                               | $5.55 \times 10^{-8}$ |
| hsa05140:Leishmaniasis                             | $4.06 \times 10^{-7}$ |
| hsa05133:Pertussis                                 | $5.36 \times 10^{-7}$ |
| hsa04932:Non-alcoholic fatty liver disease (NAFLD) | $6.77 \times 10^{-7}$ |
| hsa05132:Salmonella infection                      | $8.91 \times 10^{-7}$ |
| hsa05010:Alzheimer's disease                       | $1.27 \times 10^{-6}$ |
| hsa05152:Tuberculosis                              | $1.72 \times 10^{-6}$ |
| hsa05142:Chagas disease (American trypanosomiasis) | $2.74 \times 10^{-6}$ |
| hsa04668:TNF signaling pathway                     | $3.16 \times 10^{-6}$ |
| hsa05145:Toxoplasmosis                             | $3.62 \times 10^{-6}$ |
| hsa04621:NOD-like receptor signaling pathway       | $6.67 \times 10^{-6}$ |
| hsa04380:Osteoclast differentiation                | $8.56 \times 10^{-6}$ |
| hsa05200:Pathways in cancer                        | $1.37 \times 10^{-5}$ |
| hsa05222:Small cell lung cancer                    | $3.53 \times 10^{-5}$ |
| hsa04024:cAMP signaling pathway                    | $6.33 \times 10^{-5}$ |
| hsa04620:Toll-like receptor signaling pathway      | $8.41 \times 10^{-5}$ |
| hsa04014:Ras signaling pathway                     | $1.19 \times 10^{-4}$ |
| hsa04722:Neurotrophin signaling pathway            | $1.36 \times 10^{-4}$ |
| hsa04010:MAPK signaling pathway                    | $2.02 \times 10^{-4}$ |
| hsa05160:Hepatitis C                               | $2.03 \times 10^{-4}$ |
| hsa05161:Hepatitis B                               | $2.83 \times 10^{-4}$ |
| hsa05210:Colorectal cancer                         | $3.59 \times 10^{-4}$ |
| hsa05131:Shigellosis                               | $3.95 \times 10^{-4}$ |
| hsa05212:Pancreatic cancer                         | $4.13 \times 10^{-4}$ |
| hsa04662:B cell receptor signaling pathway         | $4.93 \times 10^{-4}$ |
| hsa04917:Prolactin signaling pathway               | $5.36 \times 10^{-4}$ |
| hsa05168:Herpes simplex infection                  | $6.86 \times 10^{-4}$ |
| hsa04064:NF-kappa B signaling pathway              | $9.71 \times 10^{-4}$ |
| hsa05215:Prostate cancer                           | 0.001004329           |
| hsa04660:T cell receptor signaling pathway         | 0.001454886           |
| hsa04931:Insulin resistance                        | 0.001816109           |
| hsa04725:Cholinergic synapse                       | 0.0019648             |
| hsa05020:Prion diseases                            | 0.002724775           |
| hsa05162:Measles                                   | 0.003290683           |
| hsa04068:FoxO signaling pathway                    | 0.003361258           |
| hsa04910:Insulin signaling pathway                 | 0.003652913           |
| hsa04930:Type II diabetes mellitus                 | 0.005375755           |
| hsa05030:Cocaine addiction                         | 0.005596926           |
| hsa05014:Amyotrophic lateral sclerosis (ALS)       | 0.005822243           |
| hsa05134:Legionellosis                             | 0.006764598           |
| hsa04151:PI3K-Akt signaling pathway                | 0.006998406           |
| hsa05221:Acute myeloid leukemia                    | 0.007260181           |

|                                                                     |             |
|---------------------------------------------------------------------|-------------|
| hsa04020:Calcium signaling pathway                                  | 0.007558119 |
| hsa04062:Chemokine signaling pathway                                | 0.008401243 |
| hsa04210:Apoptosis                                                  | 0.008842847 |
| hsa04623:Cytosolic DNA-sensing pathway                              | 0.00940191  |
| hsa05321:Inflammatory bowel disease (IBD)                           | 0.00940191  |
| hsa05031:Amphetamine addiction                                      | 0.009976494 |
| hsa04720:Long-term potentiation                                     | 0.009976494 |
| hsa05120:Epithelial cell signaling in Helicobacter pylori infection | 0.010269564 |
| hsa04920:Adipocytokine signaling pathway                            | 0.01117168  |
| hsa04622:RIG-I-like receptor signaling pathway                      | 0.01117168  |
| hsa05220:Chronic myeloid leukemia                                   | 0.011792009 |
| hsa04012:ErbB signaling pathway                                     | 0.016912655 |
| hsa04713:Circadian entrainment                                      | 0.019968916 |
| hsa04066:HIF-1 signaling pathway                                    | 0.020366278 |
| hsa04723:Retrograde endocannabinoid signaling                       | 0.022403087 |
| hsa04080:Neuroactive ligand-receptor interaction                    | 0.024507326 |
| hsa05146:Amoebiasis                                                 | 0.024521802 |
| hsa04726:Serotonergic synapse                                       | 0.026720505 |
| hsa04724:Glutamatergic synapse                                      | 0.028077335 |
| hsa04071:Sphingolipid signaling pathway                             | 0.030873734 |
| hsa05169:Epstein-Barr virus infection                               | 0.031829949 |
| hsa04728:Dopaminergic synapse                                       | 0.034769215 |

Table S3-2 GO Enrichment analysis (BP) of similar genes between target genes of KXS compound and essential genes of AD

| Term                                                                                               | P Value               |
|----------------------------------------------------------------------------------------------------|-----------------------|
| GO:0006954~inflammatory response                                                                   | $5.87 \times 10^{-4}$ |
| GO:0051092~positive regulation of NF-kappaB transcription factor activity                          | 0.00169               |
| GO:0003056~regulation of vascular smooth muscle contraction                                        | 0.001904              |
| GO:0031622~positive regulation of fever generation                                                 | 0.00238               |
| GO:0046541~saliva secretion                                                                        | 0.00238               |
| GO:1903140~regulation of establishment of endothelial barrier                                      | 0.003331              |
| GO:0007197~adenylate cyclase-inhibiting G-protein coupled acetylcholine receptor signaling pathway | 0.003331              |
| GO:0007207~phospholipase C-activating G-protein coupled acetylcholine receptor signaling pathway   | 0.003806              |
| GO:0035729~cellular response to hepatocyte growth factor stimulus                                  | 0.006652              |
| GO:0007213~G-protein coupled acetylcholine receptor signaling pathway                              | 0.007125              |
| GO:0007399~nervous system development                                                              | 0.007615              |
| GO:0045944~positive regulation of transcription from RNA polymerase II promoter                    | 0.008917              |
| GO:0046827~positive regulation of protein export from nucleus                                      | 0.009018              |



|                                                                                 |          |
|---------------------------------------------------------------------------------|----------|
| GO:0042346~positive regulation of NF-kappaB import into nucleus                 | 0.009963 |
| GO:0045987~positive regulation of smooth muscle contraction                     | 0.009963 |
| GO:0008283~cell proliferation                                                   | 0.012162 |
| GO:0010575~positive regulation of vascular endothelial growth factor production | 0.012794 |
| GO:0046627~negative regulation of insulin receptor signaling pathway            | 0.013736 |
| GO:0042177~negative regulation of protein catabolic process                     | 0.015147 |
| GO:0097192~extrinsic apoptotic signaling pathway in absence of ligand           | 0.016087 |
| GO:0007271~synaptic transmission, cholinergic                                   | 0.017496 |
| GO:0043066~negative regulation of apoptotic process                             | 0.018409 |
| GO:0007566~embryo implantation                                                  | 0.019839 |
| GO:0045429~positive regulation of nitric oxide biosynthetic process             | 0.020307 |
| GO:0045893~positive regulation of transcription, DNA-templated                  | 0.023253 |
| GO:0050727~regulation of inflammatory response                                  | 0.029629 |
| GO:0050796~regulation of insulin secretion                                      | 0.031484 |
| GO:0035690~cellular response to drug                                            | 0.032411 |
| GO:0071260~cellular response to mechanical stimulus                             | 0.033336 |
| GO:0007623~circadian rhythm                                                     | 0.035185 |
| GO:0009887~organ morphogenesis                                                  | 0.043008 |
| GO:0002223~stimulatory C-type lectin receptor signaling pathway                 | 0.048953 |
| GO:0006464~cellular protein modification process                                | 0.048953 |

Table S3-3 GO Enrichment analysis (CC) of similar genes between target genes of KXS compound and essential genes of AD

| Term                                       | P Value  |
|--------------------------------------------|----------|
| GO:0005829~cytosol                         | 0.001484 |
| GO:0048471~perinuclear region of cytoplasm | 0.015285 |
| GO:0005776~autophagosome                   | 0.024977 |
| GO:0045211~postsynaptic membrane           | 0.03854  |
| GO:0031410~cytoplasmic vesicle             | 0.04749  |

Table S3-4 GO Enrichment analysis (MF) of similar genes between target genes of KXS compound and essential genes of AD

| Term                                                         | P Value  |
|--------------------------------------------------------------|----------|
| GO:0016907~G-protein coupled acetylcholine receptor activity | 0.005574 |
| GO:0005149~interleukin-1 receptor binding                    | 0.007161 |

Table S4-1 KEGG Enrichment analysis of similar genes between target genes of DGSYS compound and essential genes of AD

| Term | P Value |
|------|---------|
|------|---------|

|                                                    |                       |
|----------------------------------------------------|-----------------------|
| hsa04024:cAMP signaling pathway                    | $7.65 \times 10^{-7}$ |
| hsa05142:Chagas disease (American trypanosomiasis) | $8.38 \times 10^{-7}$ |
| hsa04668:TNF signaling pathway                     | $9.66 \times 10^{-7}$ |
| hsa04014:Ras signaling pathway                     | $1.67 \times 10^{-6}$ |
| hsa04621:NOD-like receptor signaling pathway       | $2.67 \times 10^{-6}$ |
| hsa05140:Leishmaniasis                             | $6.95 \times 10^{-6}$ |
| hsa05133:Pertussis                                 | $8.65 \times 10^{-6}$ |
| hsa05010:Alzheimer's disease                       | $8.99 \times 10^{-6}$ |
| hsa05164:Influenza A                               | $1.07 \times 10^{-5}$ |
| hsa05132:Salmonella infection                      | $1.3 \times 10^{-5}$  |
| hsa04620:Toll-like receptor signaling pathway      | $3.42 \times 10^{-5}$ |
| hsa05145:Toxoplasmosis                             | $3.96 \times 10^{-5}$ |
| hsa05200:Pathways in cancer                        | $4.07 \times 10^{-5}$ |
| hsa04722:Neurotrophin signaling pathway            | $5.58 \times 10^{-5}$ |
| hsa04380:Osteoclast differentiation                | $7.86 \times 10^{-5}$ |
| hsa05160:Hepatitis C                               | $8.34 \times 10^{-5}$ |
| hsa05030:Cocaine addiction                         | $9.24 \times 10^{-5}$ |
| hsa04932:Non-alcoholic fatty liver disease (NAFLD) | 0.000137              |
| hsa05131:Shigellosis                               | 0.000206              |
| hsa05212:Pancreatic cancer                         | 0.000215              |
| hsa04720:Long-term potentiation                    | 0.000225              |
| hsa05152:Tuberculosis                              | 0.000253              |
| hsa04662:B cell receptor signaling pathway         | 0.000257              |
| hsa04020:Calcium signaling pathway                 | 0.000264              |
| hsa04917:Prolactin signaling pathway               | 0.00028               |
| hsa05222:Small cell lung cancer                    | 0.000476              |
| hsa04064:NF-kappa B signaling pathway              | 0.00051               |
| hsa05215:Prostate cancer                           | 0.000527              |
| hsa04713:Circadian entrainment                     | 0.00066               |
| hsa04660:T cell receptor signaling pathway         | 0.000767              |
| hsa04931:Insulin resistance                        | 0.00096               |
| hsa04010:MAPK signaling pathway                    | 0.000982              |
| hsa04725:Cholinergic synapse                       | 0.001039              |
| hsa04724:Glutamatergic synapse                     | 0.001123              |
| hsa04080:Neuroactive ligand-receptor interaction   | 0.001379              |
| hsa04728:Dopaminergic synapse                      | 0.00157               |
| hsa04910:Insulin signaling pathway                 | 0.00195               |
| hsa05161:Hepatitis B                               | 0.002247              |
| hsa05033:Nicotine addiction                        | 0.00247               |
| hsa04151:PI3K-Akt signaling pathway                | 0.003098              |
| hsa04930:Type II diabetes mellitus                 | 0.003541              |
| hsa05014:Amyotrophic lateral sclerosis (ALS)       | 0.003837              |
| hsa05034:Alcoholism                                | 0.00396               |

|                                                                     |          |
|---------------------------------------------------------------------|----------|
| hsa05168:Herpes simplex infection                                   | 0.004351 |
| hsa04062:Chemokine signaling pathway                                | 0.004554 |
| hsa05221:Acute myeloid leukemia                                     | 0.004794 |
| hsa05210:Colorectal cancer                                          | 0.005849 |
| hsa04623:Cytosolic DNA-sensing pathway                              | 0.006222 |
| hsa04015:Rap1 signaling pathway                                     | 0.006396 |
| hsa05031:Amphetamine addiction                                      | 0.006606 |
| hsa05120:Epithelial cell signaling in Helicobacter pylori infection | 0.006802 |
| hsa04920:Adipocytokine signaling pathway                            | 0.007406 |
| hsa04622:RIG-I-like receptor signaling pathway                      | 0.007406 |
| hsa05220:Chronic myeloid leukemia                                   | 0.007822 |
| hsa04012:ErbB signaling pathway                                     | 0.011266 |
| hsa04066:HIF-1 signaling pathway                                    | 0.013602 |
| hsa04723:Retrograde endocannabinoid signaling                       | 0.014984 |
| hsa05146:Amoebiasis                                                 | 0.016424 |
| hsa04071:Sphingolipid signaling pathway                             | 0.020761 |
| hsa05169:Epstein-Barr virus infection                               | 0.021416 |
| hsa05162:Measles                                                    | 0.025173 |
| hsa04068:FoxO signaling pathway                                     | 0.025528 |

Table S4-2 GO Enrichment analysis (BP) of similar genes between target genes of DGSYS compound and essential genes of AD

| Term                                                                                               | P Value               |
|----------------------------------------------------------------------------------------------------|-----------------------|
| GO:0019233~sensory perception of pain                                                              | $7.84 \times 10^{-6}$ |
| GO:0000165~MAPK cascade                                                                            | $3.71 \times 10^{-5}$ |
| GO:0035235~ionotropic glutamate receptor signaling pathway                                         | 0.000151              |
| GO:0042177~negative regulation of protein catabolic process                                        | 0.000271              |
| GO:0038095~Fc-epsilon receptor signaling pathway                                                   | 0.00031               |
| GO:0007268~chemical synaptic transmission                                                          | 0.000742              |
| GO:0006954~inflammatory response                                                                   | 0.002757              |
| GO:0045471~response to ethanol                                                                     | 0.002888              |
| GO:0000187~activation of MAPK activity                                                             | 0.002997              |
| GO:0003056~regulation of vascular smooth muscle contraction                                        | 0.003093              |
| GO:0046541~saliva secretion                                                                        | 0.003865              |
| GO:0031622~positive regulation of fever generation                                                 | 0.003865              |
| GO:0051092~positive regulation of NF-kappaB transcription factor activity                          | 0.004587              |
| GO:0006468~protein phosphorylation                                                                 | 0.004644              |
| GO:0007197~adenylate cyclase-inhibiting G-protein coupled acetylcholine receptor signaling pathway | 0.005408              |
| GO:1903140~regulation of establishment of endothelial barrier                                      | 0.005408              |
| GO:0045944~positive regulation of transcription from RNA polymerase II promoter                    | 0.005411              |

|                                                                                                  |          |
|--------------------------------------------------------------------------------------------------|----------|
| GO:0050852~T cell receptor signaling pathway                                                     | 0.005647 |
| GO:0007207~phospholipase C-activating G-protein coupled acetylcholine receptor signaling pathway | 0.006178 |
| GO:0045893~positive regulation of transcription, DNA-templated                                   | 0.00652  |
| GO:0043547~positive regulation of GTPase activity                                                | 0.008422 |
| GO:0007165~signal transduction                                                                   | 0.009811 |
| GO:0035729~cellular response to hepatocyte growth factor stimulus                                | 0.010788 |
| GO:0007215~glutamate receptor signaling pathway                                                  | 0.011555 |
| GO:0007213~G-protein coupled acetylcholine receptor signaling pathway                            | 0.011555 |
| GO:0046827~positive regulation of protein export from nucleus                                    | 0.014615 |
| GO:0045987~positive regulation of smooth muscle contraction                                      | 0.016142 |
| GO:0042346~positive regulation of NF-kappaB import into nucleus                                  | 0.016142 |
| GO:0043278~response to morphine                                                                  | 0.017667 |
| GO:0051090~regulation of sequence-specific DNA binding transcription factor activity             | 0.019189 |
| GO:0007399~nervous system development                                                            | 0.020053 |
| GO:0010575~positive regulation of vascular endothelial growth factor production                  | 0.02071  |
| GO:0010800~positive regulation of peptidyl-threonine phosphorylation                             | 0.02071  |
| GO:0060079~excitatory postsynaptic potential                                                     | 0.021469 |
| GO:0043065~positive regulation of apoptotic process                                              | 0.02179  |
| GO:0046627~negative regulation of insulin receptor signaling pathway                             | 0.022228 |
| GO:0042493~response to drug                                                                      | 0.022337 |
| GO:0001975~response to amphetamine                                                               | 0.023744 |
| GO:0031663~lipopolysaccharide-mediated signaling pathway                                         | 0.024501 |
| GO:0097192~extrinsic apoptotic signaling pathway in absence of ligand                            | 0.026014 |
| GO:0007611~learning or memory                                                                    | 0.027524 |
| GO:0007271~synaptic transmission, cholinergic                                                    | 0.028279 |
| GO:0018107~peptidyl-threonine phosphorylation                                                    | 0.029033 |
| GO:0060291~long-term synaptic potentiation                                                       | 0.029033 |
| GO:0008283~cell proliferation                                                                    | 0.031534 |
| GO:0007566~embryo implantation                                                                   | 0.032043 |
| GO:0045429~positive regulation of nitric oxide biosynthetic process                              | 0.032794 |
| GO:0008542~visual learning                                                                       | 0.034295 |
| GO:0043066~negative regulation of apoptotic process                                              | 0.04691  |
| GO:0007613~memory                                                                                | 0.046966 |
| GO:0050727~regulation of inflammatory response                                                   | 0.047707 |
| GO:0009611~response to wounding                                                                  | 0.047707 |
| GO:0008284~positive regulation of cell proliferation                                             | 0.048974 |

Table S4-3 GO Enrichment analysis (CC) of similar genes between target genes of DGSYS compound and essential genes of AD

| Term                                                 | P Value               |
|------------------------------------------------------|-----------------------|
| GO:0030054~cell junction                             | $1.08 \times 10^{-5}$ |
| GO:0045211~postsynaptic membrane                     | $1.15 \times 10^{-5}$ |
| GO:0017146~NMDA selective glutamate receptor complex | $2.57 \times 10^{-5}$ |
| GO:0045202~synapse                                   | 0.000256              |
| GO:0014069~postsynaptic density                      | 0.000269              |
| GO:0043005~neuron projection                         | 0.000564              |
| GO:0032279~asymmetric synapse                        | 0.005694              |
| GO:0043083~synaptic cleft                            | 0.005694              |
| GO:0009986~cell surface                              | 0.005989              |
| GO:0005622~intracellular                             | 0.011902              |
| GO:0005886~plasma membrane                           | 0.014002              |
| GO:0005887~integral component of plasma membrane     | 0.014654              |
| GO:0005829~cytosol                                   | 0.01924               |
| GO:0030425~dendrite                                  | 0.022988              |
| GO:0043679~axon terminus                             | 0.033716              |
| GO:0005901~caveola                                   | 0.045403              |

Table S4-4 GO Enrichment analysis (MF) of similar genes between target genes of DGSYS compound and essential genes of AD

| Term                                                          | P Value               |
|---------------------------------------------------------------|-----------------------|
| GO:0004972~NMDA glutamate receptor activity                   | $1.53 \times 10^{-5}$ |
| GO:0005234~extracellular-glutamate-gated ion channel activity | $8.32 \times 10^{-5}$ |
| GO:0042803~protein homodimerization activity                  | 0.001814              |
| GO:0005088~Ras guanyl-nucleotide exchange factor activity     | 0.003417              |
| GO:0016907~G-protein coupled acetylcholine receptor activity  | 0.005379              |
| GO:0004707~MAP kinase activity                                | 0.010732              |
| GO:0016594~glycine binding                                    | 0.011494              |
| GO:0004970~ionotropic glutamate receptor activity             | 0.011494              |
| GO:0005515~protein binding                                    | 0.016236              |
| GO:0042166~acetylcholine binding                              | 0.019846              |
| GO:0004435~phosphatidylinositol phospholipase C activity      | 0.020601              |
| GO:0051059~NF-kappaB binding                                  | 0.022866              |
| GO:0004672~protein kinase activity                            | 0.030134              |
| GO:0004674~protein serine/threonine kinase activity           | 0.032818              |
| GO:0019901~protein kinase binding                             | 0.032818              |

Table S5-1 KEGG Enrichment analysis of similar genes between target genes of YGS compound and essential genes of AD

| Term                   | P Value               |
|------------------------|-----------------------|
| hsa05140:Leishmaniasis | $2.81 \times 10^{-7}$ |

|                                                     |                       |
|-----------------------------------------------------|-----------------------|
| hsa05133: Pertussis                                 | $3.71 \times 10^{-7}$ |
| hsa05132: Salmonella infection                      | $6.19 \times 10^{-7}$ |
| hsa05010: Alzheimer's disease                       | $8.09 \times 10^{-7}$ |
| hsa05164: Influenza A                               | $9.95 \times 10^{-7}$ |
| hsa05142: Chagas disease (American trypanosomiasis) | $1.91 \times 10^{-6}$ |
| hsa04024: cAMP signaling pathway                    | $2.13 \times 10^{-6}$ |
| hsa04668: TNF signaling pathway                     | $2.2 \times 10^{-6}$  |
| hsa04014: Ras signaling pathway                     | $4.59 \times 10^{-6}$ |
| hsa04621: NOD-like receptor signaling pathway       | $5.03 \times 10^{-6}$ |
| hsa04380: Osteoclast differentiation                | $5.98 \times 10^{-6}$ |
| hsa04932: Non-alcoholic fatty liver disease (NAFLD) | $1.2 \times 10^{-5}$  |
| hsa05152: Tuberculosis                              | $2.6 \times 10^{-5}$  |
| hsa04620: Toll-like receptor signaling pathway      | $6.38 \times 10^{-5}$ |
| hsa05145: Toxoplasmosis                             | $7.38 \times 10^{-5}$ |
| hsa04722: Neurotrophin signaling pathway            | 0.000104              |
| hsa05200: Pathways in cancer                        | 0.000108              |
| hsa04010: MAPK signaling pathway                    | 0.000143              |
| hsa05030: Cocaine addiction                         | 0.000146              |
| hsa05160: Hepatitis C                               | 0.000155              |
| hsa05131: Shigellosis                               | 0.000323              |
| hsa05212: Pancreatic cancer                         | 0.000338              |
| hsa04720: Long-term potentiation                    | 0.000354              |
| hsa04662: B cell receptor signaling pathway         | 0.000403              |
| hsa04917: Prolactin signaling pathway               | 0.000439              |
| hsa04020: Calcium signaling pathway                 | 0.000483              |
| hsa05222: Small cell lung cancer                    | 0.000744              |
| hsa04064: NF-kappa B signaling pathway              | 0.000797              |
| hsa05215: Prostate cancer                           | 0.000824              |
| hsa04713: Circadian entrainment                     | 0.001029              |
| hsa04660: T cell receptor signaling pathway         | 0.001195              |
| hsa04931: Insulin resistance                        | 0.001493              |
| hsa04725: Cholinergic synapse                       | 0.001615              |
| hsa04724: Glutamatergic synapse                     | 0.001744              |
| hsa05020: Prion diseases                            | 0.002392              |
| hsa04728: Dopaminergic synapse                      | 0.002431              |
| hsa04080: Neuroactive ligand-receptor interaction   | 0.00247               |
| hsa05162: Measles                                   | 0.002712              |
| hsa04910: Insulin signaling pathway                 | 0.003012              |
| hsa05033: Nicotine addiction                        | 0.0033                |
| hsa05161: Hepatitis B                               | 0.003466              |
| hsa04930: Type II diabetes mellitus                 | 0.004725              |
| hsa05014: Amyotrophic lateral sclerosis (ALS)       | 0.005118              |
| hsa04151: PI3K-Akt signaling pathway                | 0.005462              |

|                                                                     |          |
|---------------------------------------------------------------------|----------|
| hsa05034:Alcoholism                                                 | 0.006067 |
| hsa05221:Acute myeloid leukemia                                     | 0.006386 |
| hsa05168:Herpes simplex infection                                   | 0.006656 |
| hsa04062:Chemokine signaling pathway                                | 0.006963 |
| hsa05210:Colorectal cancer                                          | 0.007782 |
| hsa05321:Inflammatory bowel disease (IBD)                           | 0.008276 |
| hsa04623:Cytosolic DNA-sensing pathway                              | 0.008276 |
| hsa05031:Amphetamine addiction                                      | 0.008783 |
| hsa05120:Epithelial cell signaling in Helicobacter pylori infection | 0.009042 |
| hsa04015:Rap1 signaling pathway                                     | 0.009727 |
| hsa04920:Adipocytokine signaling pathway                            | 0.009839 |
| hsa04622:RIG-I-like receptor signaling pathway                      | 0.009839 |
| hsa05220:Chronic myeloid leukemia                                   | 0.010388 |
| hsa04012:ErbB signaling pathway                                     | 0.01492  |
| hsa04066:HIF-1 signaling pathway                                    | 0.017982 |
| hsa04723:Retrograde endocannabinoid signaling                       | 0.01979  |
| hsa05146:Amoebiasis                                                 | 0.021672 |
| hsa04071:Sphingolipid signaling pathway                             | 0.027322 |
| hsa05169:Epstein-Barr virus infection                               | 0.028173 |
| hsa04068:FoxO signaling pathway                                     | 0.033506 |

Table S5-2 GO Enrichment analysis (BP) of similar genes between target genes of YGS compound and essential genes of AD

| Term                                                                            | P Value               |
|---------------------------------------------------------------------------------|-----------------------|
| GO:0019233~sensory perception of pain                                           | $1.24 \times 10^{-5}$ |
| GO:0000165~MAPK cascade                                                         | $6.9 \times 10^{-5}$  |
| GO:0035235~ionotropic glutamate receptor signaling pathway                      | 0.000203              |
| GO:0010575~positive regulation of vascular endothelial growth factor production | 0.000258              |
| GO:0006954~inflammatory response                                                | 0.000286              |
| GO:0042177~negative regulation of protein catabolic process                     | 0.000364              |
| GO:0097192~extrinsic apoptotic signaling pathway in absence of ligand           | 0.000411              |
| GO:0038095~Fc-epsilon receptor signaling pathway                                | 0.000485              |
| GO:0007268~chemical synaptic transmission                                       | 0.001155              |
| GO:0045944~positive regulation of transcription from RNA polymerase II promoter | 0.001236              |
| GO:0001660~fever generation                                                     | 0.002678              |
| GO:0003056~regulation of vascular smooth muscle contraction                     | 0.003569              |
| GO:0008283~cell proliferation                                                   | 0.003846              |
| GO:0045471~response to ethanol                                                  | 0.003856              |
| GO:0000187~activation of MAPK activity                                          | 0.004001              |
| GO:0031622~positive regulation of fever generation                              | 0.004459              |

---

|                                                                                                    |          |
|----------------------------------------------------------------------------------------------------|----------|
| GO:0046541~saliva secretion                                                                        | 0.004459 |
| GO:0019221~cytokine-mediated signaling pathway                                                     | 0.005934 |
| GO:0051092~positive regulation of NF-kappaB transcription factor activity                          | 0.006111 |
| GO:1903140~regulation of establishment of endothelial barrier                                      | 0.006237 |
| GO:0071639~positive regulation of monocyte chemotactic protein-1 production                        | 0.006237 |
| GO:0007197~adenylate cyclase-inhibiting G-protein coupled acetylcholine receptor signaling pathway | 0.006237 |
| GO:0006468~protein phosphorylation                                                                 | 0.007097 |
| GO:0007207~phospholipase C-activating G-protein coupled acetylcholine receptor signaling pathway   | 0.007125 |
| GO:0035234~ectopic germ cell programmed cell death                                                 | 0.007125 |
| GO:0050852~T cell receptor signaling pathway                                                       | 0.007515 |
| GO:0043123~positive regulation of I-kappaB kinase/NF-kappaB signaling                              | 0.008838 |
| GO:0045893~positive regulation of transcription, DNA-templated                                     | 0.009911 |
| GO:0045086~positive regulation of interleukin-2 biosynthetic process                               | 0.01067  |
| GO:0070498~interleukin-1-mediated signaling pathway                                                | 0.012438 |
| GO:0035729~cellular response to hepatocyte growth factor stimulus                                  | 0.012438 |
| GO:0043547~positive regulation of GTPase activity                                                  | 0.012746 |
| GO:0007215~glutamate receptor signaling pathway                                                    | 0.013321 |
| GO:0007213~G-protein coupled acetylcholine receptor signaling pathway                              | 0.013321 |
| GO:0007165~signal transduction                                                                     | 0.016768 |
| GO:0046827~positive regulation of protein export from nucleus                                      | 0.016846 |
| GO:0045987~positive regulation of smooth muscle contraction                                        | 0.018603 |
| GO:0042346~positive regulation of NF-kappaB import into nucleus                                    | 0.018603 |
| GO:0043278~response to morphine                                                                    | 0.020358 |
| GO:0051090~regulation of sequence-specific DNA binding transcription factor activity               | 0.02211  |
| GO:0045840~positive regulation of mitotic nuclear division                                         | 0.022985 |
| GO:0010800~positive regulation of peptidyl-threonine phosphorylation                               | 0.023859 |
| GO:0060079~excitatory postsynaptic potential                                                       | 0.024732 |
| GO:0046627~negative regulation of insulin receptor signaling pathway                               | 0.025605 |
| GO:0007399~nervous system development                                                              | 0.026397 |
| GO:0001975~response to amphetamine                                                                 | 0.027348 |
| GO:0031663~lipopolysaccharide-mediated signaling pathway                                           | 0.028218 |
| GO:0043065~positive regulation of apoptotic process                                                | 0.028655 |
| GO:0042493~response to drug                                                                        | 0.029365 |
| GO:0007611~learning or memory                                                                      | 0.031693 |
| GO:0050714~positive regulation of protein secretion                                                | 0.031693 |
| GO:2001240~negative regulation of extrinsic apoptotic signaling pathway in absence of ligand       | 0.03256  |
| GO:0007271~synaptic transmission, cholinergic                                                      | 0.03256  |
| GO:0018107~peptidyl-threonine phosphorylation                                                      | 0.033426 |
| GO:0060291~long-term synaptic potentiation                                                         | 0.033426 |

---



|                                                                     |          |
|---------------------------------------------------------------------|----------|
| GO:0007566~embryo implantation                                      | 0.036883 |
| GO:0045429~positive regulation of nitric oxide biosynthetic process | 0.037746 |
| GO:0032755~positive regulation of interleukin-6 production          | 0.039468 |
| GO:0008542~visual learning                                          | 0.039468 |
| GO:0051781~positive regulation of cell division                     | 0.041188 |
| GO:0008285~negative regulation of cell proliferation                | 0.047571 |

Table S5-3 GO Enrichment analysis (CC) of similar genes between target genes of YGS compound and essential genes of AD

| Term                                                 | P Value               |
|------------------------------------------------------|-----------------------|
| GO:0045211~postsynaptic membrane                     | $2.16 \times 10^{-5}$ |
| GO:0030054~cell junction                             | $2.42 \times 10^{-5}$ |
| GO:0017146~NMDA selective glutamate receptor complex | $3.46 \times 10^{-5}$ |
| GO:0045202~synapse                                   | 0.000402              |
| GO:0014069~postsynaptic density                      | 0.000421              |
| GO:0009986~cell surface                              | 0.000813              |
| GO:0043005~neuron projection                         | 0.00088               |
| GO:0005887~integral component of plasma membrane     | 0.00435               |
| GO:0032279~asymmetric synapse                        | 0.006567              |
| GO:0043083~synaptic cleft                            | 0.006567              |
| GO:0005886~plasma membrane                           | 0.009282              |
| GO:0005829~cytosol                                   | 0.010745              |
| GO:0005622~intracellular                             | 0.020214              |
| GO:0030425~dendrite                                  | 0.03021               |
| GO:0043679~axon terminus                             | 0.038803              |

Table S5-4 GO Enrichment analysis (MF) of similar genes between target genes of YGS compound and essential genes of AD

| Term                                                          | P Value               |
|---------------------------------------------------------------|-----------------------|
| GO:0004972~NMDA glutamate receptor activity                   | $2.06 \times 10^{-5}$ |
| GO:0005234~extracellular-glutamate-gated ion channel activity | 0.000112              |
| GO:0042803~protein homodimerization activity                  | 0.003231              |
| GO:0005088~Ras guanyl-nucleotide exchange factor activity     | 0.004559              |
| GO:0005515~protein binding                                    | 0.005766              |
| GO:0016907~G-protein coupled acetylcholine receptor activity  | 0.006205              |
| GO:0005149~interleukin-1 receptor binding                     | 0.011494              |
| GO:0004707~MAP kinase activity                                | 0.012373              |
| GO:0016594~glycine binding                                    | 0.013251              |
| GO:0004970~ionotropic glutamate receptor activity             | 0.013251              |
| GO:0042166~acetylcholine binding                              | 0.022865              |
| GO:0004435~phosphatidylinositol phospholipase C activity      | 0.023734              |

|                                                     |          |
|-----------------------------------------------------|----------|
| GO:0051059~NF-kappaB binding                        | 0.026339 |
| GO:0001540~beta-amyloid binding                     | 0.029801 |
| GO:0004672~protein kinase activity                  | 0.039453 |
| GO:0004674~protein serine/threonine kinase activity | 0.04291  |
| GO:0019901~protein kinase binding                   | 0.04291  |

Table S6-1 KEGG Enrichment analysis of similar genes between target genes of YQTYT compound and essential genes of AD

| Term                                               | P Value               |
|----------------------------------------------------|-----------------------|
| hsa05164:Influenza A                               | $5.55 \times 10^{-8}$ |
| hsa05140:Leishmaniasis                             | $4.06 \times 10^{-7}$ |
| hsa05133:Pertussis                                 | $5.36 \times 10^{-7}$ |
| hsa04932:Non-alcoholic fatty liver disease (NAFLD) | $6.77 \times 10^{-7}$ |
| hsa05132:Salmonella infection                      | $8.91 \times 10^{-7}$ |
| hsa05010:Alzheimer's disease                       | $1.27 \times 10^{-6}$ |
| hsa05152:Tuberculosis                              | $1.72 \times 10^{-6}$ |
| hsa05142:Chagas disease (American trypanosomiasis) | $2.74 \times 10^{-6}$ |
| hsa04668:TNF signaling pathway                     | $3.16 \times 10^{-6}$ |
| hsa05145:Toxoplasmosis                             | $3.62 \times 10^{-6}$ |
| hsa04621:NOD-like receptor signaling pathway       | $6.67 \times 10^{-6}$ |
| hsa04380:Osteoclast differentiation                | $8.56 \times 10^{-6}$ |
| hsa05200:Pathways in cancer                        | $1.37 \times 10^{-5}$ |
| hsa05222:Small cell lung cancer                    | $3.53 \times 10^{-5}$ |
| hsa04024:cAMP signaling pathway                    | $6.33 \times 10^{-5}$ |
| hsa04620:Toll-like receptor signaling pathway      | $8.41 \times 10^{-5}$ |
| hsa04014:Ras signaling pathway                     | 0.000119              |
| hsa04722:Neurotrophin signaling pathway            | 0.000136              |
| hsa04010:MAPK signaling pathway                    | 0.000202              |
| hsa05160:Hepatitis C                               | 0.000203              |
| hsa05161:Hepatitis B                               | 0.000283              |
| hsa05210:Colorectal cancer                         | 0.000359              |
| hsa05131:Shigellosis                               | 0.000395              |
| hsa05212:Pancreatic cancer                         | 0.000413              |
| hsa04662:B cell receptor signaling pathway         | 0.000493              |
| hsa04917:Prolactin signaling pathway               | 0.000536              |
| hsa05168:Herpes simplex infection                  | 0.000686              |
| hsa04064:NF-kappa B signaling pathway              | 0.000971              |
| hsa05215:Prostate cancer                           | 0.001004              |
| hsa04660:T cell receptor signaling pathway         | 0.001455              |
| hsa04931:Insulin resistance                        | 0.001816              |
| hsa04725:Cholinergic synapse                       | 0.001965              |
| hsa05020:Prion diseases                            | 0.002725              |

|                                                                     |          |
|---------------------------------------------------------------------|----------|
| hsa05162:Measles                                                    | 0.003291 |
| hsa04068:FoxO signaling pathway                                     | 0.003361 |
| hsa04910:Insulin signaling pathway                                  | 0.003653 |
| hsa04930:Type II diabetes mellitus                                  | 0.005376 |
| hsa05030:Cocaine addiction                                          | 0.005597 |
| hsa05014:Amyotrophic lateral sclerosis (ALS)                        | 0.005822 |
| hsa05134:Legionellosis                                              | 0.006765 |
| hsa04151:PI3K-Akt signaling pathway                                 | 0.006998 |
| hsa05221:Acute myeloid leukemia                                     | 0.00726  |
| hsa04020:Calcium signaling pathway                                  | 0.007558 |
| hsa04062:Chemokine signaling pathway                                | 0.008401 |
| hsa04210:Apoptosis                                                  | 0.008843 |
| hsa04623:Cytosolic DNA-sensing pathway                              | 0.009402 |
| hsa05321:Inflammatory bowel disease (IBD)                           | 0.009402 |
| hsa05031:Amphetamine addiction                                      | 0.009976 |
| hsa04720:Long-term potentiation                                     | 0.009976 |
| hsa05120:Epithelial cell signaling in Helicobacter pylori infection | 0.01027  |
| hsa04920:Adipocytokine signaling pathway                            | 0.011172 |
| hsa04622:RIG-I-like receptor signaling pathway                      | 0.011172 |
| hsa05220:Chronic myeloid leukemia                                   | 0.011792 |
| hsa04012:ErbB signaling pathway                                     | 0.016913 |
| hsa04713:Circadian entrainment                                      | 0.019969 |
| hsa04066:HIF-1 signaling pathway                                    | 0.020366 |
| hsa04723:Retrograde endocannabinoid signaling                       | 0.022403 |
| hsa04080:Neuroactive ligand-receptor interaction                    | 0.024507 |
| hsa05146:Amoebiasis                                                 | 0.024522 |
| hsa04726:Serotonergic synapse                                       | 0.026721 |
| hsa04724:Glutamatergic synapse                                      | 0.028077 |
| hsa04071:Sphingolipid signaling pathway                             | 0.030874 |
| hsa05169:Epstein-Barr virus infection                               | 0.03183  |
| hsa04728:Dopaminergic synapse                                       | 0.034769 |

Table S6-2 GO Enrichment analysis (BP) of similar genes between target genes of YQTYT compound and essential genes of AD

| Term                                                                            | P Value               |
|---------------------------------------------------------------------------------|-----------------------|
| GO:0045944~positive regulation of transcription from RNA polymerase II promoter | $1.63 \times 10^{-5}$ |
| GO:0035235~ionotropic glutamate receptor signaling pathway                      | 0.000232              |
| GO:0010575~positive regulation of vascular endothelial growth factor production | 0.000295              |
| GO:0006954~inflammatory response                                                | 0.000375              |
| GO:0097192~extrinsic apoptotic signaling pathway in absence of ligand           | 0.000469              |

---

|                                                                                                    |          |
|----------------------------------------------------------------------------------------------------|----------|
| GO:0038095~Fc-epsilon receptor signaling pathway                                                   | 0.000592 |
| GO:0006468~protein phosphorylation                                                                 | 0.000753 |
| GO:0019233~sensory perception of pain                                                              | 0.001098 |
| GO:0000165~MAPK cascade                                                                            | 0.001809 |
| GO:1900034~regulation of cellular response to heat                                                 | 0.002268 |
| GO:0007399~nervous system development                                                              | 0.002346 |
| GO:0001660~fever generation                                                                        | 0.002856 |
| GO:0003056~regulation of vascular smooth muscle contraction                                        | 0.003806 |
| GO:0000187~activation of MAPK activity                                                             | 0.004554 |
| GO:0008283~cell proliferation                                                                      | 0.004657 |
| GO:0046541~saliva secretion                                                                        | 0.004756 |
| GO:0031622~positive regulation of fever generation                                                 | 0.004756 |
| GO:0006979~response to oxidative stress                                                            | 0.004806 |
| GO:0071356~cellular response to tumor necrosis factor                                              | 0.004806 |
| GO:0045766~positive regulation of angiogenesis                                                     | 0.00524  |
| GO:0071639~positive regulation of monocyte chemotactic protein-1 production                        | 0.006652 |
| GO:0007197~adenylate cyclase-inhibiting G-protein coupled acetylcholine receptor signaling pathway | 0.006652 |
| GO:1903140~regulation of establishment of endothelial barrier                                      | 0.006652 |
| GO:0019221~cytokine-mediated signaling pathway                                                     | 0.006747 |
| GO:0051092~positive regulation of NF-kappaB transcription factor activity                          | 0.006948 |
| GO:0007207~phospholipase C-activating G-protein coupled acetylcholine receptor signaling pathway   | 0.007599 |
| GO:0035234~ectopic germ cell programmed cell death                                                 | 0.007599 |
| GO:0043066~negative regulation of apoptotic process                                                | 0.008509 |
| GO:0050852~T cell receptor signaling pathway                                                       | 0.008539 |
| GO:0008284~positive regulation of cell proliferation                                               | 0.009085 |
| GO:0043123~positive regulation of I-kappaB kinase/NF-kappaB signaling                              | 0.010038 |
| GO:0045086~positive regulation of interleukin-2 biosynthetic process                               | 0.011378 |
| GO:0045893~positive regulation of transcription, DNA-templated                                     | 0.011924 |
| GO:0001967~suckling behavior                                                                       | 0.012321 |
| GO:0070498~interleukin-1-mediated signaling pathway                                                | 0.013262 |
| GO:0035729~cellular response to hepatocyte growth factor stimulus                                  | 0.013262 |
| GO:0007213~G-protein coupled acetylcholine receptor signaling pathway                              | 0.014203 |
| GO:0046827~positive regulation of protein export from nucleus                                      | 0.017959 |
| GO:0042346~positive regulation of NF-kappaB import into nucleus                                    | 0.019832 |
| GO:0045987~positive regulation of smooth muscle contraction                                        | 0.019832 |
| GO:0007165~signal transduction                                                                     | 0.021159 |
| GO:0007268~chemical synaptic transmission                                                          | 0.021395 |
| GO:0043278~response to morphine                                                                    | 0.021701 |
| GO:0051090~regulation of sequence-specific DNA binding transcription factor activity               | 0.023567 |
| GO:0045840~positive regulation of mitotic nuclear division                                         | 0.024499 |

---

|                                                                                              |          |
|----------------------------------------------------------------------------------------------|----------|
| GO:0010800~positive regulation of peptidyl-threonine phosphorylation                         | 0.02543  |
| GO:0046627~negative regulation of insulin receptor signaling pathway                         | 0.027289 |
| GO:0031663~lipopolysaccharide-mediated signaling pathway                                     | 0.030072 |
| GO:0042177~negative regulation of protein catabolic process                                  | 0.030072 |
| GO:0043065~positive regulation of apoptotic process                                          | 0.032368 |
| GO:0050714~positive regulation of protein secretion                                          | 0.033771 |
| GO:0007271~synaptic transmission, cholinergic                                                | 0.034693 |
| GO:2001240~negative regulation of extrinsic apoptotic signaling pathway in absence of ligand | 0.034693 |
| GO:0018107~peptidyl-threonine phosphorylation                                                | 0.035615 |
| GO:0007566~embryo implantation                                                               | 0.039294 |
| GO:0045429~positive regulation of nitric oxide biosynthetic process                          | 0.040212 |
| GO:0032755~positive regulation of interleukin-6 production                                   | 0.042045 |
| GO:0008542~visual learning                                                                   | 0.042045 |
| GO:0051781~positive regulation of cell division                                              | 0.043874 |
| GO:0008344~adult locomotory behavior                                                         | 0.048434 |

Table S6-3 GO Enrichment analysis (CC) of similar genes between target genes of YQTYT compound and essential genes of AD

| Term                                                 | P Value               |
|------------------------------------------------------|-----------------------|
| GO:0045202~synapse                                   | $1.56 \times 10^{-5}$ |
| GO:0030054~cell junction                             | 0.000568              |
| GO:0005829~cytosol                                   | 0.000715              |
| GO:0045211~postsynaptic membrane                     | 0.000767              |
| GO:0043083~synaptic cleft                            | 0.007004              |
| GO:0032279~asymmetric synapse                        | 0.007004              |
| GO:0017146~NMDA selective glutamate receptor complex | 0.009618              |
| GO:0009986~cell surface                              | 0.010975              |
| GO:0014069~postsynaptic density                      | 0.011086              |
| GO:0048471~perinuclear region of cytoplasm           | 0.015833              |
| GO:0043005~neuron projection                         | 0.017924              |
| GO:0005739~mitochondrion                             | 0.025364              |
| GO:0005622~intracellular                             | 0.025427              |
| GO:0043198~dendritic shaft                           | 0.027739              |
| GO:0005887~integral component of plasma membrane     | 0.030966              |
| GO:0030425~dendrite                                  | 0.034113              |
| GO:0043679~axon terminus                             | 0.041337              |
| GO:0031594~neuromuscular junction                    | 0.047229              |
| GO:0005886~plasma membrane                           | 0.049323              |

Table S6-4 GO Enrichment analysis (MF) of similar genes between target genes of YQTYT

| compound and essential genes of AD                            |          |
|---------------------------------------------------------------|----------|
| Term                                                          | P Value  |
| GO:0005515~protein binding                                    | 0.003393 |
| GO:0042803~protein homodimerization activity                  | 0.004162 |
| GO:0016907~G-protein coupled acetylcholine receptor activity  | 0.006617 |
| GO:0020037~heme binding                                       | 0.007283 |
| GO:0004972~NMDA glutamate receptor activity                   | 0.007559 |
| GO:0005149~interleukin-1 receptor binding                     | 0.012256 |
| GO:0004707~MAP kinase activity                                | 0.013193 |
| GO:0016594~glycine binding                                    | 0.014129 |
| GO:0005234~extracellular-glutamate-gated ion channel activity | 0.016932 |
| GO:0042166~acetylcholine binding                              | 0.024371 |
| GO:0004435~phosphatidylinositol phospholipase C activity      | 0.025297 |
| GO:0051059~NF-kappaB binding                                  | 0.028071 |
| GO:0008134~transcription factor binding                       | 0.028975 |
| GO:0042802~identical protein binding                          | 0.031631 |
| GO:0019899~enzyme binding                                     | 0.0388   |
| GO:0005102~receptor binding                                   | 0.043133 |
| GO:0004672~protein kinase activity                            | 0.044468 |
| GO:0019901~protein kinase binding                             | 0.048333 |
| GO:0004674~protein serine/threonine kinase activity           | 0.048333 |
